# Supplementary material for: Bread-inspired foaming strategy to fabricate a wine lees-based porous carbon framework for high specific energy supercapacitors
Source: Royal Society of Chemistry journal article supplement (doi:10.1039/d1se01059j), 2021-01-01
Supplement: d1se01059j1.pdf [file d1se01059j1.pdf]

## Supporting Information

### **Bread-inspired foaming strategy to fabricate wine lees-based porous carbon framework for high specific energy supercapacitor**

Hui Peng<sup>‡\*</sup>, Yipu Xu<sup>‡</sup>, Yaping Jiang, Xin Wang, Rui Zhao, Faqiang Wang, Lu Li, and Guofu Ma\*

Key Laboratory of Eco-Functional Polymer Materials of the Ministry of Education, Key Laboratory of Polymer Materials of Gansu Province, College of Chemistry and Chemical Engineering, Northwest Normal University, Lanzhou 730070, China.

<sup>‡</sup>These authors contributed equally to this work. They should thus be considered co-first authors.

\*Corresponding authors. E-mail addresses: penghui@nwnu.edu.cn (H. Peng), magf@nwnu.edu.cn (G. Ma)

## **S1. Material Characterization**

The morphologies and structures of the as-prepared samples were characterized by field-emission scanning electron microscopy (FESEM, Carl Zeiss, Ultra Plus, Germany), transmission electron microscopy (TEM, JEM-2010 Japan). The chemical compositions were confirmed on a K-Alpha system (American) using a monochromatic Al K $\alpha$  radiation source. The crystal structures and defects of samples were examined via X-ray diffraction (XRD, D/Max-2400, Rigaku,  $k=1.5418 \text{ \AA}$ , 40 kV, 100 mA) and Raman spectroscopy (Rainie Salt Public Co. Ltd., Britain, 514 nm excitation laser). The Brunauer-Emmett-Teller (BET) surface area of the samples was analyzed by nitrogen adsorption-desorption in a surface area and porosimetry analyzer (ASAP 2020, Micromeritics, U.S.A.). Thermogravimetric analysis was performed on a thermogravimetric analyzer (NETZSCH STA 449 F3) in N<sub>2</sub> with a heating rate of 10 °C min<sup>-1</sup>.

## **S2. Electrochemical measurement**

### **Three-electrode system**

Preparation of electrode: The active materials (80 wt %), acetylene black (10 wt %), and binder (poly(tetrafluoroethylene), 10 wt %) were homogeneously mixed in 1-methyl-2-pyrrolidone (NMP) to form a slurry. Then the solution was dropped onto square Ni foam film (1.0×1.0 cm) and dried at 80 °C in vacuum overnight. The electrode areal loading is 4-5 mg cm<sup>-2</sup> and the active material/substrate weight ratio is 0.07-0.09.

Electrochemical test: cyclic voltammetry (CV), galvanostatic charge-discharge (GCD) tests and electrochemical impedance spectroscopy (EIS) tests were performed on the CHI 660D electrochemical workstation within a voltage window of -1.0 V for 2 M KOH electrolytes, respectively. The used

counter and reference electrodes are carbon rod electrode and Hg/HgO electrode, and the as-prepared electrode as the working electrode. The specific capacitance charge-discharge measurement was calculated based on the following formula:  $C = (I\Delta t) / (m\Delta V)$ , where  $C$  ( $F g^{-1}$ ) is the specific capacitance,  $I$  ( $A g^{-1}$ ) is current density,  $\Delta t$  (s) is discharge time,  $m$  (g) is the mass of a single electrode, and  $\Delta V$  (V) is the potential window during the discharge process.

### **Two-electrode system**

In the two-electrode symmetric systems (CR2032), symmetric supercapacitor was assembled by two electrodes with the same size and mass of the active material served as positive and negative electrodes, and a glassy fibrous separator. 0.5 M  $Na_2SO_4$ , 2.0 M KOH aqueous solutions and [Emim]BF<sub>4</sub> ionic liquid were employed as electrolyte respectively. The corresponding electrochemical performance test is the same as the three-electrode system. The electrode areal loading is 4-5 mg cm<sup>-2</sup> and the active material/substrate weight ratio is 0.07-0.09.

The specific capacitance is counted as  $C = (4I \Delta t) / (m \Delta V)$ , where  $C$  ( $F g^{-1}$ ) is specific capacitance,  $I$  ( $A g^{-1}$ ) is the discharge current density,  $\Delta t$  (s) is the discharge time,  $m$  (g) is the total mass of positive and negative electrodes for two-electrode cells, and  $\Delta V$  (V) is the potential window. The specific energy density ( $E$ , Wh kg<sup>-1</sup>) and power density ( $P$ , W kg<sup>-1</sup>) for a symmetric supercapacitor were calculated using equation:  $E = 1/2CV^2$  and  $P = E/t$ , where  $C$  ( $F g^{-1}$ ) is the specific capacitance of symmetric supercapacitor,  $V$  (V) is voltage change during the discharge process and  $t$  (s) is the corresponding discharge time.

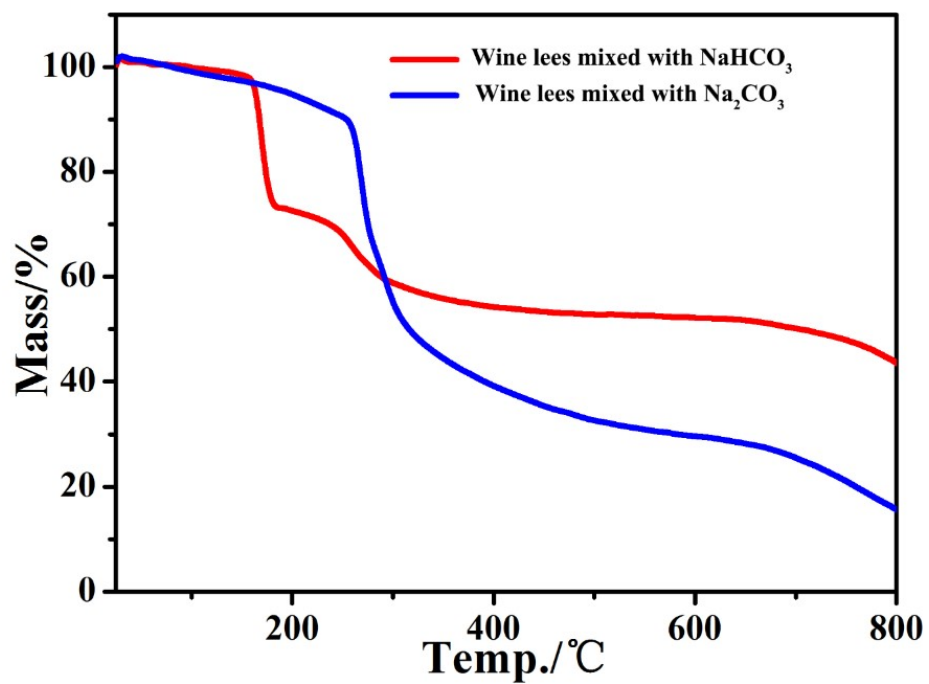

Figure S1 TGA curves of the precursors heated under N<sub>2</sub> atmosphere.

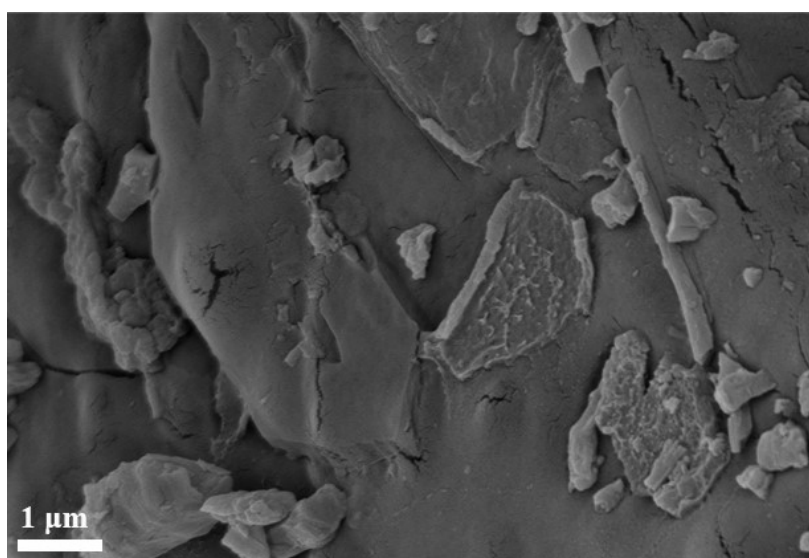

Figure S2 SEM images of the wine lees.

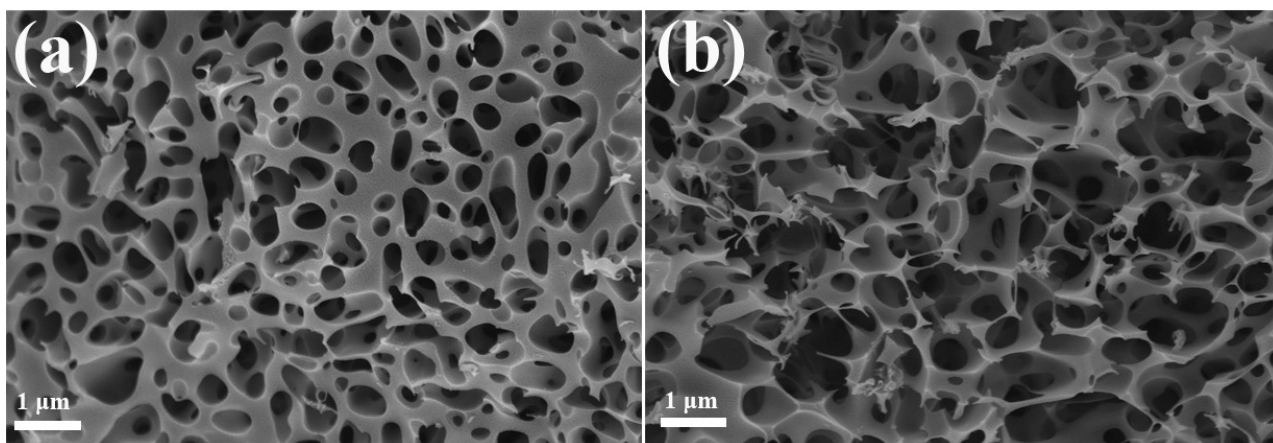

Figure S3 SEM images of the (a) WLCF-1 and (b) WLCF-3.

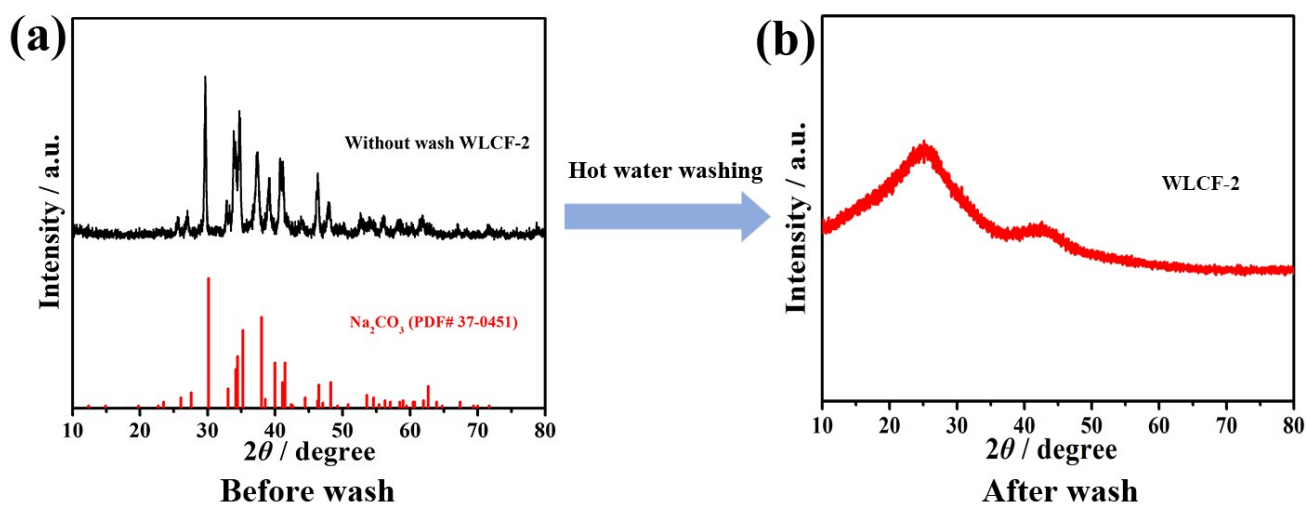

Figure S4 The XRD pattern comparisons of the WLCF-2 of (a) before and (b) after washing.

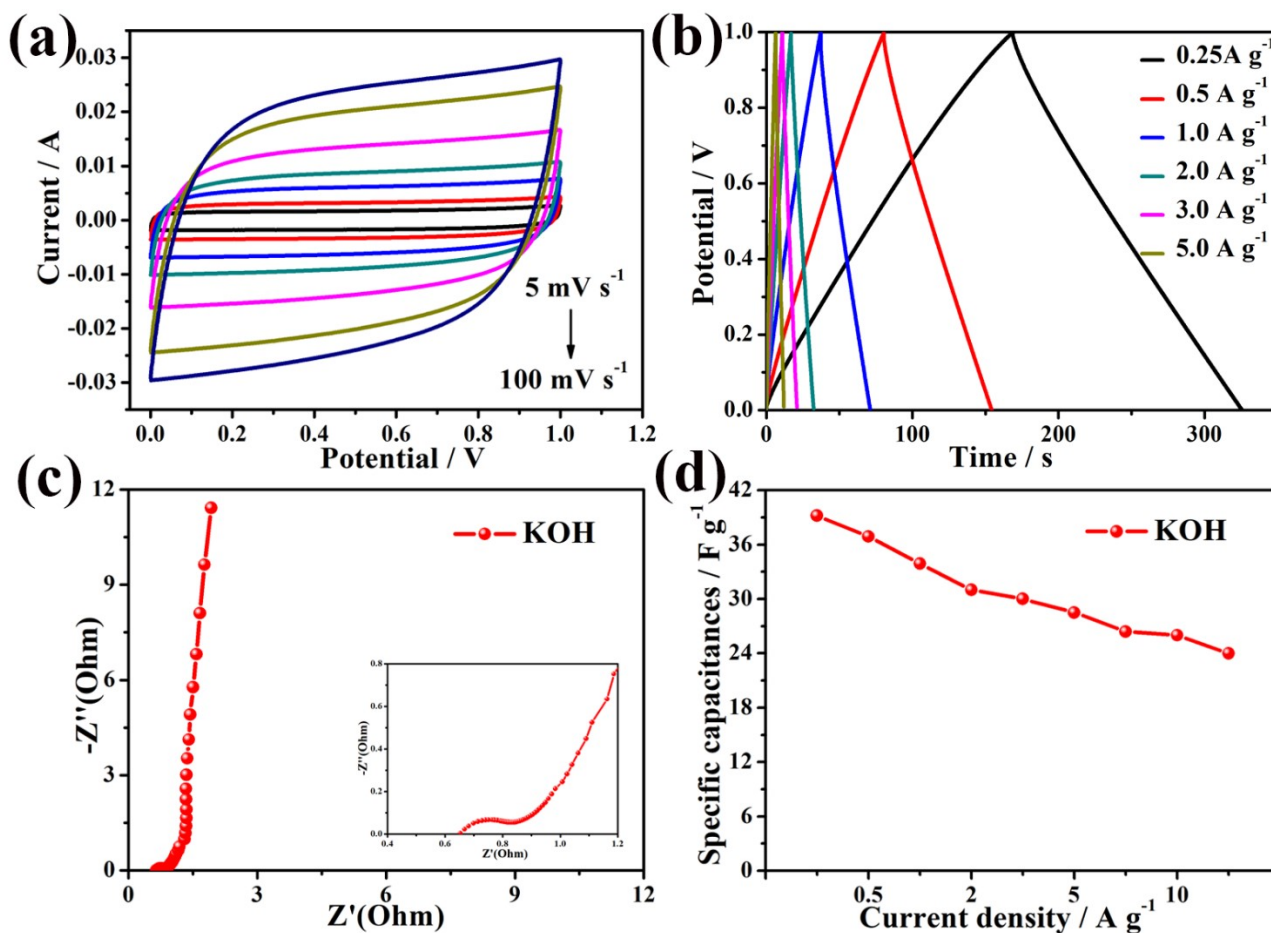

**Figure S5** (a) CV curves of the supercapacitor in KOH electrolyte at different scan rates; (b) GCD curves of the supercapacitor in KOH electrolyte at various current densities; (c) Nyquist plots and (d) the corresponding discharge capacitances of the supercapacitor in KOH electrolyte.

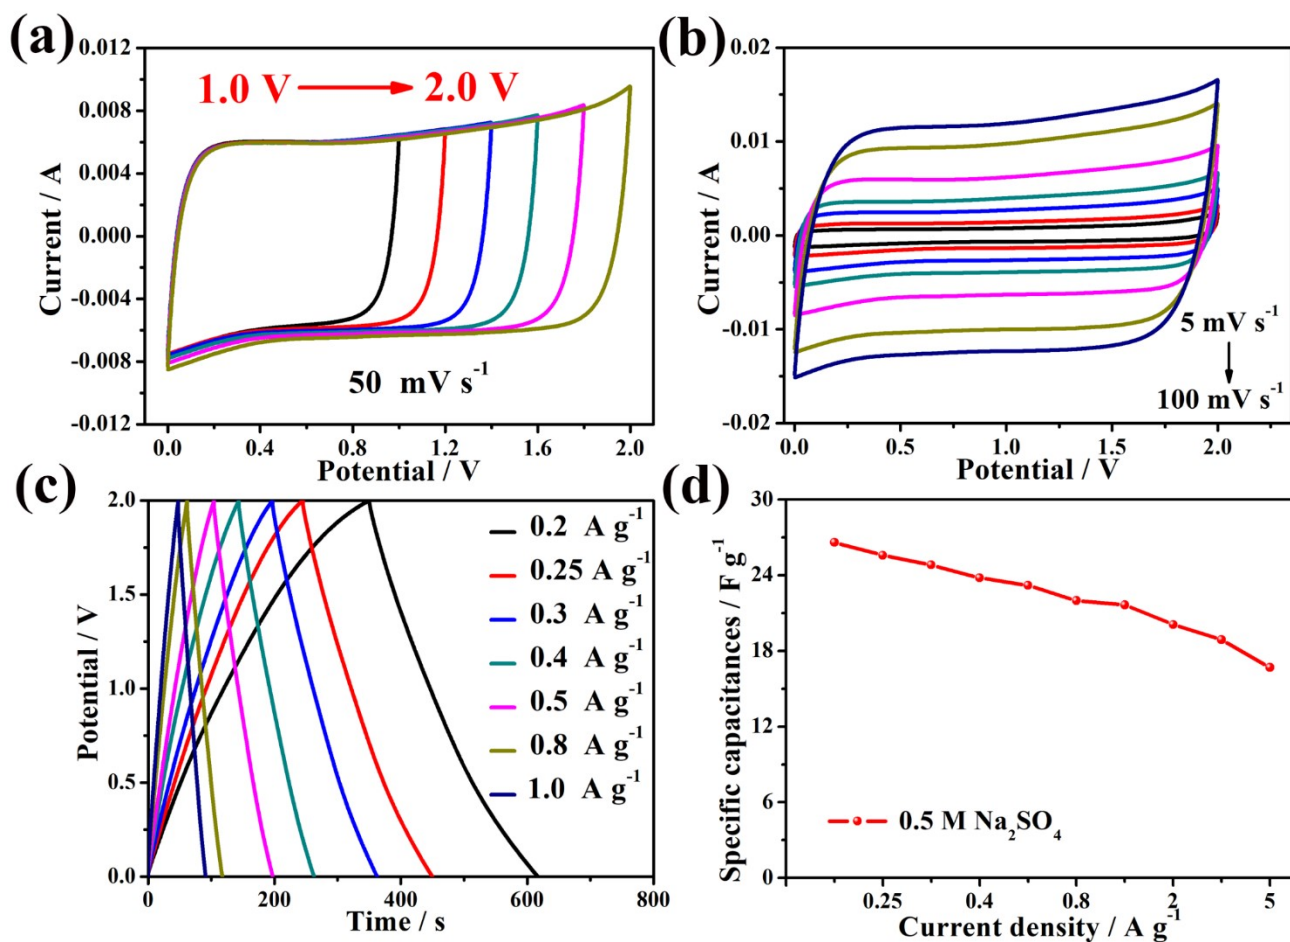

**Figure S6** (a) CV curves of o supercapacitor at different voltage in 0.5 M Na<sub>2</sub>SO<sub>4</sub> electrolyte; (b) CV curves of the supercapacitor in Na<sub>2</sub>SO<sub>4</sub> electrolyte at various scan rates; (c) GCD curves of the supercapacitor in Na<sub>2</sub>SO<sub>4</sub> electrolyte at various current densities and (d) the corresponding discharge capacitances of the supercapacitor in Na<sub>2</sub>SO<sub>4</sub> electrolyte.

**Table S1.** BET surface area, pore structure parameters, element contents and the XRD data of carbon materials.

| <b>Samples</b> | <b>S<sub>BET</sub><br/>(m<sup>2</sup> g<sup>-1</sup>)</b> | <b>Pore volume<br/>(cm<sup>3</sup> g<sup>-1</sup>)</b> | <b>Average pore size<br/>(nm)</b> | <b>C (wt<br/>%)</b> | <b>N (wt<br/>%)</b> | <b>O (wt<br/>%)</b> | <b>d<sub>002</sub> (nm)</b> |
|----------------|-----------------------------------------------------------|--------------------------------------------------------|-----------------------------------|---------------------|---------------------|---------------------|-----------------------------|
| WLCF-0         | 473.5                                                     | 0.54                                                   | 4.58                              | 80.17               | 9.27                | 10.56               | 0.347                       |
| WLCF-1         | 840.6                                                     | 0.55                                                   | 3.39                              | 80.09               | 8.72                | 11.19               | 0.350                       |
| WLCF-2         | 1494.6                                                    | 0.76                                                   | 2.05                              | 80.76               | 8.21                | 11.03               | 0.353                       |
| WLCF-3         | 954.7                                                     | 0.59                                                   | 2.46                              | 84.85               | 5.02                | 10.13               | 0.359                       |
| WLC            | 1106.1                                                    | 0.56                                                   | 2.01                              | 80.10               | 8.18                | 11.72               | 0.341                       |



**Table S2.** Performances comparison of symmetric cells used various carbon materials in the references.

| <b>Carbon-based materials</b>                                      | <b>Working voltage</b> | <b>Electrolyte</b>                    | <b>E (Wh kg<sup>-1</sup>)</b> | <b>P (W kg<sup>-1</sup>)</b> | <b>Refs.</b> |
|--------------------------------------------------------------------|------------------------|---------------------------------------|-------------------------------|------------------------------|--------------|
| Wine lees-derived carbon framework (WLCF)                          | 2.0 V                  | 0.5 M Na <sub>2</sub> SO <sub>4</sub> | 18.0                          | 225                          | This work    |
|                                                                    | 4.0 V                  | EMIMBF <sub>4</sub>                   | 54.0                          | 401                          |              |
| pomelo peels-derived carbon microsheets (PPCs)                     | 1.6 V                  | 1 M Na <sub>2</sub> SO <sub>4</sub>   | 11.7                          | 160                          | [S1]         |
| N/P codoped hierarchical porous carbons (NPHCs)                    | 1.6 V                  | 1 M Na <sub>2</sub> SO <sub>4</sub>   | 10.61                         | 400                          | [S2]         |
| N-doped carbon (NC)                                                | 1.0 V                  | 6 M KOH                               | 7.3                           | 125.1                        | [S3]         |
| hemicellulose-derived porous activated carbon (HPAC)               | 1.0 V                  | H <sub>2</sub> SO <sub>4</sub> /PVA   | 11.7                          | 349.9                        | [S4]         |
| N-doped black liquor-derived porous carbons (N-BLPC)               | 1.0 V                  | 6 M KOH                               | 9.34                          | 250                          | [S5]         |
| Nitrogen-doped hierarchical porous carbon (NHPC)                   | 0.7 V                  | 6 M KOH                               | 9.43                          | 630                          | [S6]         |
| activated nitrogen-doped porous carbons (ANPCs)                    | 1.8 V                  | 0.5 M Na <sub>2</sub> SO <sub>4</sub> | 12.5                          | 450                          | [S7]         |
| Medulla tetrapanacis-derived O/N co-doped porous carbon (MT-900)   | 1.8 V                  | 1.0 M Na <sub>2</sub> SO <sub>4</sub> | 14.3                          | 465.9                        | [S8]         |
| Nitrogen-doped nanostructure carbon (N-HNC)                        | 1.0 V                  | 6 M KOH                               | 15.99                         | 500                          | [S9]         |
| Nitrogen/sulfur co-doped porous carbons (NSPCs)                    | 3.0 V                  | 1.0 M EMTMPF <sub>6</sub>             | 30.6                          | 468.8                        | [S10]        |
| Nitrogen and oxygen enriched hierarchically porous carbon (NOHPCs) | 2.8 V                  | 1.0 M TEATFB                          | 31.4                          | 350.9                        | [S11]        |
| Boron doping carbon materials                                      | 3.0 V                  | EMIMBF <sub>4</sub> /AN               | 42                            | 4500                         | [S12]        |

(CAB-20)

---

## References

- S1. Wang, Z.; Tan, Y.; Yang, Y.; Zhao, X.; Liu, Y.; Niu, L.; Tichnell, B.; Kong, L.; Kang, L.; Liu, Z.; Ran, F. Pomelo peels-derived porous activated carbon microsheets dual-doped with nitrogen and phosphorus for high performance electrochemical capacitors. *J. Power Sources* **2018**, *378*, 499-510.
- S2. Zhang, Y.; Sun, Q.; Xia, K.; Han, B.; Zhou, C.; Gao, Q.; Wang, H.; Pu, S.; Wu, J. Facile synthesis of hierarchically porous N/P codoped carbon with simultaneously high-level heteroatom-doping and moderate porosity for high-performance supercapacitor electrodes. *ACS Sustain. Chem. Eng.* **2019**, *7* (6), 5717-5726.
- S3. Guo, D.; Qian, J.; Xin, R.; Zhang, Z.; Jiang, W.; Hu, G.; Fan, M. Facile synthesis of nitrogen-enriched nanoporous carbon materials for high performance supercapacitors. *J. Colloid Interface Sci.* **2019**, *538*, 199-208.
- S4. Lin, H.; Liu, Y.; Chang, Z.; Yan, S.; Liu, S.; Han, S. A new method of synthesizing hemicellulose-derived porous activated carbon for high-performance supercapacitors. *Microporous Mesoporous Mater.* **2020**, *292*, 109707.
- S5. Zhu, L.; Shen, F.; Smith, R. L.; Yan, L.; Li, L.; Qi, X. Black liquor-derived porous carbons from rice straw for high-performance supercapacitors. *Chem. Eng. J.* **2017**, *316*, 770-777.
- S6. Zeng, R.; Tang, X.; Huang, B.; Yuan, K.; Chen, Y. Nitrogen-doped hierarchically porous carbon materials with enhanced performance for supercapacitor. *ChemElectroChem* **2018**, *5* (3), 515-522.
- S7. Lin, G.; Ma, R.; Zhou, Y.; Liu, Q.; Dong, X.; Wang, J. KOH activation of biomass-derived nitrogen-doped carbons for supercapacitor and electrocatalytic oxygen reduction. *Electrochim. Acta* **2018**, *261*, 49-57.
- S8. Liu, B.; Yang, M.; Yang, D.; Chen, H.; Li, H. Medulla tetrapanacis-derived O/N co-doped porous carbon materials for efficient oxygen reduction electrocatalysts and high-rate supercapacitors. *Electrochim. Acta* **2018**, *272*, 88-96.
- S9. Shang, Z.; An, X.; Zhang, H.; Shen, M.; Baker, F.; Liu, Y.; Liu, L.; Yang, J.; Cao, H.; Xu, Q.; Liu, H.; Ni, Y. Houttuynia-derived nitrogen-doped hierarchically porous carbon for high-performance supercapacitor. *Carbon* **2020**, *161*, 62-70.
- S10. Han, J.; Li, Q.; Peng, C.; Shu, N.; Pan, F.; Wang, J.; Zhu, Y. Increasing S dopant and specific surface area of N/S-codoped porous carbon by in-situ polymerization of PEDOT into biomass

precursor for high performance supercapacitor. *Appl. Surf. Sci.* **2020**, *502*, 144191.

S11. Yan, W.; Meng, Z.; Zou, M.; Miao, H.; Ma, F.; Yu, R.; Qiu, W.; Liu, X. Y.; Lin, N. Neutralization reaction in synthesis of carbon materials for supercapacitors. *Chem. Eng. J.* **2020**, *381*, 122547.

S12. Chen, D. D.; He, Z. Q.; Wang, M.; Wu, D.; Chen, X. Y.; Zhang, Z. J. Boron doping and structure control of carbon materials for supercapacitor application: the effect of freeze-drying and air-drying for porosity engineering. *J. Solid State Electr.* **2020**, *24* (3), 641-654.
